# Supplementary material for: Can Leukotriene Receptor Antagonist Therapy Improve the Control of Patients with Severe Asthma on Biological Therapy and Coexisting Bronchiectasis? A Pilot Study
Source: MDPI journal article supplement (doi:10.3390/jcm11164702), 2022-08-11
Supplement: s1 [file s1]

**Supplementary Table S1: Baseline comparison based on LTRA therapy intake**

| <b>BASELINE</b>                              |                            |                           |                |
|----------------------------------------------|----------------------------|---------------------------|----------------|
|                                              | <b>LTRA yes<br/>(n=15)</b> | <b>LTRA no<br/>(n=24)</b> | <b>P Value</b> |
| Age , year m $\pm$ sd                        | 59.67 $\pm$ 8.88           | 58.67 $\pm$ 12.64         | 0.782          |
| Female sex, %                                | 53.3                       | 47.6                      | 0.050          |
| BMI, kg/m <sup>2</sup> m $\pm$ sd            | 25.95 $\pm$ 2.66           | 24.08 $\pm$ 3.91          | 0.118          |
| Smoker, %                                    |                            |                           | 0.818          |
| current                                      | 13.3                       | 14.3                      |                |
| former                                       | 33.3                       | 23.8                      |                |
| never                                        | 53,3                       | 61.9                      |                |
| BSI, score m $\pm$ sd                        | 7.23 $\pm$ 2.94            | 6.00 $\pm$ 3.44           | 0.327          |
| FACED, score m $\pm$ sd                      | 2.37 $\pm$ 1.30            | 1.66 $\pm$ 0.57           | 0.247          |
| Time of asthmatic disease<br>year m $\pm$ ds | 21.53 $\pm$ 13.42          | 31.80 $\pm$ 20.05         | 0.094          |
| Allergic rhinitis yes, %                     | 70.0                       | 50.0                      | 0.325          |
| Nasal Polyposis yes, %                       | 73.3                       | 66.7                      | 0.479          |
| GERD yes, %                                  | 20.0                       | 38.1                      | 0.215          |
| ASA sensibility yes, %                       | 10.0                       | 30.0                      | 0.291          |
| Biological Therapy, %                        |                            |                           | 0.369          |
| Omalizumab                                   | 19.0                       | 20.0                      |                |
| Mepolizumab                                  | 71.4                       | 53.3                      |                |
| Bernalizumab                                 | 9.5                        | 26.7                      |                |
| FeNO 50, ppb m $\pm$ sd                      | 53.59 $\pm$ 44.92          | 80.77 $\pm$ 90.09         | 0.243          |
| EOS, cells/ $\mu$ L<br>median (IQ 25-75)     | 600.00 (450.00-700.00)     | 711.00 (500.00 -1250.00)  | 0.109          |
| IGE tot, KU/l<br>median (IQ 25-75)           | 240.50 (116.00 – 800.00)   | 234.00 (132.00-384.500)   | 0.700          |
| FEV1, m $\pm$ sd                             | 71.23 $\pm$ 18.39          | 73.00 $\pm$ 25.72         | 0.834          |

|                                              |                          |                           |       |
|----------------------------------------------|--------------------------|---------------------------|-------|
| % predicted                                  |                          |                           |       |
| FVC, m ± sd                                  | 95.33 ± 13.05            | 77.00 ± 19.74             | 0.072 |
| % predicted                                  |                          |                           |       |
| RV, m ± sd                                   | 131.00 ± 43.84           | 111.42 ± 29.54            | 0.640 |
| % predicted                                  |                          |                           |       |
| ACT, score m ± sd                            | 13.57 ± 5.00             | 15.00 ± 5.09              | 0.423 |
| ACQ, score m ± sd                            | 1.76 ± 0.74              | 2.23 ± 1.45               | 0.552 |
| Need of inhaled reliever medication, %       | 66.7                     | 60.0                      | 0.570 |
| OCS yes, %                                   | 66.7                     | 70.0                      | 0.803 |
| Avarage dose of OCS, mg/dl<br>m ± sd         | 13.30 ± 10.18            | 13.82 ± 14.24             | 0.913 |
| FACED, score m ± sd                          | 2.37 ± 1.30              | 1.66 ± 0.57               | 0.247 |
| Positive Sputum %                            | 30.0                     | 14.3                      | 0.170 |
| Mucolytic therapy, yes %                     | 20.0                     | 40.0                      | 0.175 |
| Adherence to therapy, yes %                  | 80.0                     | 80.0                      | 0.709 |
| WBC , cells/μL<br>median (IQ 25-75)          | 7000.00 (6500.00 - 7350) | 7100.00 (7000.00 - 10400) | 0.603 |
| OCS course, n m ± sd                         | 5.87 ± 2.29              | 6.50 ± 3.62               | 0.688 |
| Bronchial exacerbaton<br>n m ± sd            | 4.57 ± 3.03              | 6.33 ± 3.92               | 0.145 |
| * antibiotic course,<br>n m ± sd             | 2.66 ± 1.65              | 3.12 ± 1.80               | 0.596 |
| Hospitalizations,<br>n m ± sd                | 0.77 ± 0.66              | 1.10 ± 1.11               | 0.447 |
| Unplanned visits to<br>specialists, n m ± sd | 4.44 ± 1.87              | 4.80 ± 2.15               | 0.705 |

**FACED score: FEV1% predicted. Age. Chronic colonization by *Pseudomonas aeruginosa*. Radiological extent of the disease. Dyspnea; GERD: Gastro-esophageal reflux disease; ASA sensibility: acetylsalicylic acid**

sensibility; FeNO: exhaled nitric oxide; EOS: blood eosinophilia; ; FEV1: Forced Expiratory Volume in the 1st second; FVC: Forced vital capacity; VR: residual volume; ACT: Asthma control test; ACQ: Asthma control questionnaire; OCS: oral corticosteroid ; WBC: White Blood Cells; LTRA: Leukotriene Receptor Antagonists

FACED score: FEV1% predicted. Age. Chronic colonization by *Pseudomonas aeruginosa*. Radiological extent of the disease. Dyspnea; GERD: Gastro-esophageal reflux disease; ASA sensibility: acetylsalicylic acid sensibility; FeNO: exhaled nitric oxide; EOS: blood eosinophilia; ; FEV1: Forced Expiratory Volume in the 1st second; FVC: Forced vital capacity; VR: residual volume; ACT: Asthma control test; ACQ: Asthma control questionnaire; OCS: oral corticosteroid ; WBC: White Blood Cells; LTRA: Leukotriene Receptor Antagonists

**Supplementary Table S2: Baseline comparison based on  $\Delta$  FeNO50 of Patients' characteristics, comorbidities related to asthma, radiological severity of bronchiectasis, type of biological therapy prescribed**

|                                    | <b>Group 1<br/>(n=12)</b> | <b>Group 0<br/>(n=24)</b> | <b>P Value</b> |
|------------------------------------|---------------------------|---------------------------|----------------|
| Age<br>year m $\pm$ sd             | 59.25 $\pm$ 11.31         | 59.00 $\pm$ 11.23         | 0.951          |
| Female sex, %                      | 58.3                      | 45.8                      | 0.362          |
| BMI , kg/m <sup>2</sup> m $\pm$ sd | 24.37 $\pm$ 3.60          | 25.11 $\pm$ 3.54          | 0.568          |
| Smoker %                           |                           |                           | 0.773          |
| current                            | 16.7                      | 12.5                      |                |
| former                             | 33.3                      | 25.0                      |                |
| never                              | 50.0                      | 62.5                      |                |
| BSI m $\pm$ ds                     | 5.75 $\pm$ 2.05           | 6.94 $\pm$ 3.58           | 0.286          |
| Bilateral Bronchiectasis %         | 75                        | 88.9                      | 0.538          |

|                                           |               |               |       |
|-------------------------------------------|---------------|---------------|-------|
| N. segments with bronchiectasis ,n m ± sd | 8.00 ± 8.88   | 9.55 ± 5.85   | 0.798 |
| FACED SCORE m ± sd                        | 2.66 ± 0.51   | 1.60 ± 1.51   | 0.196 |
| Time of asthmatic disease year m ± sd     | 28.17 ± 15.95 | 27.20 ± 19.43 | 0.876 |
| Allergic rhinitis yes, %                  | 50            | 50            | 0.672 |
| GERD yes, %                               | 30.6          | 29.2          | 0.544 |
| ASA sensibility yes, %                    | 20            | 20            | 0.709 |
| Biological Therapy %                      |               |               | 0.140 |
| omalizumab                                | 25.0          | 12.5          |       |
| mepolizumab                               | 41.7          | 75.0          |       |
| bernalizumab                              | 33.3          | 12.5          |       |

Group1: Δ Feno 50 <0. Group 0: Δ Feno50 ≥ 0. FACED score: FEV1% predicted. Age. Chronic colonization by Pseudomonas aeruginosa. Radiological extent of the disease. Dyspnea; GERD: Gastro-esophageal reflux disease; ASA sensibility: acetylsalicylic acid sensibility; FeNO: exhaled nitric oxide; Δ FeNO50: FeNO 50 T0 – FeNO 50 T1
